# Supplementary material for: Shifts in gut and vaginal microbiomes are associated with cancer recurrence time in women with ovarian cancer
Source: PeerJ journal article supplement (doi:10.7717/peerj.11574), 2021-06-17
Supplement: figureS2A-C.pdf [file figureS2A-C.pdf]

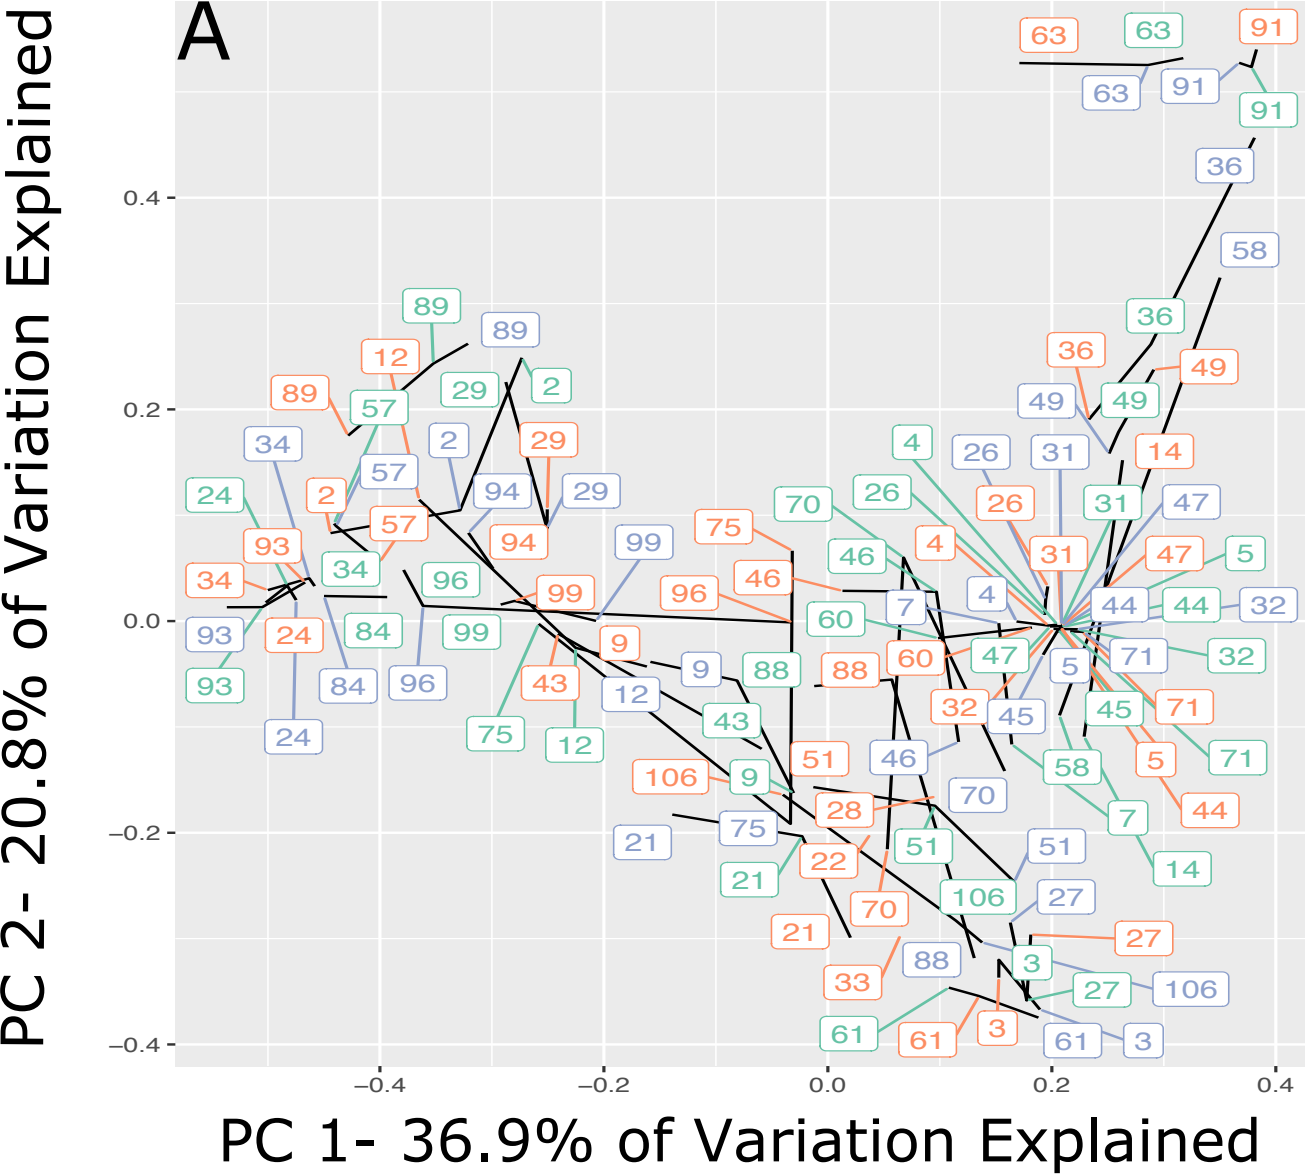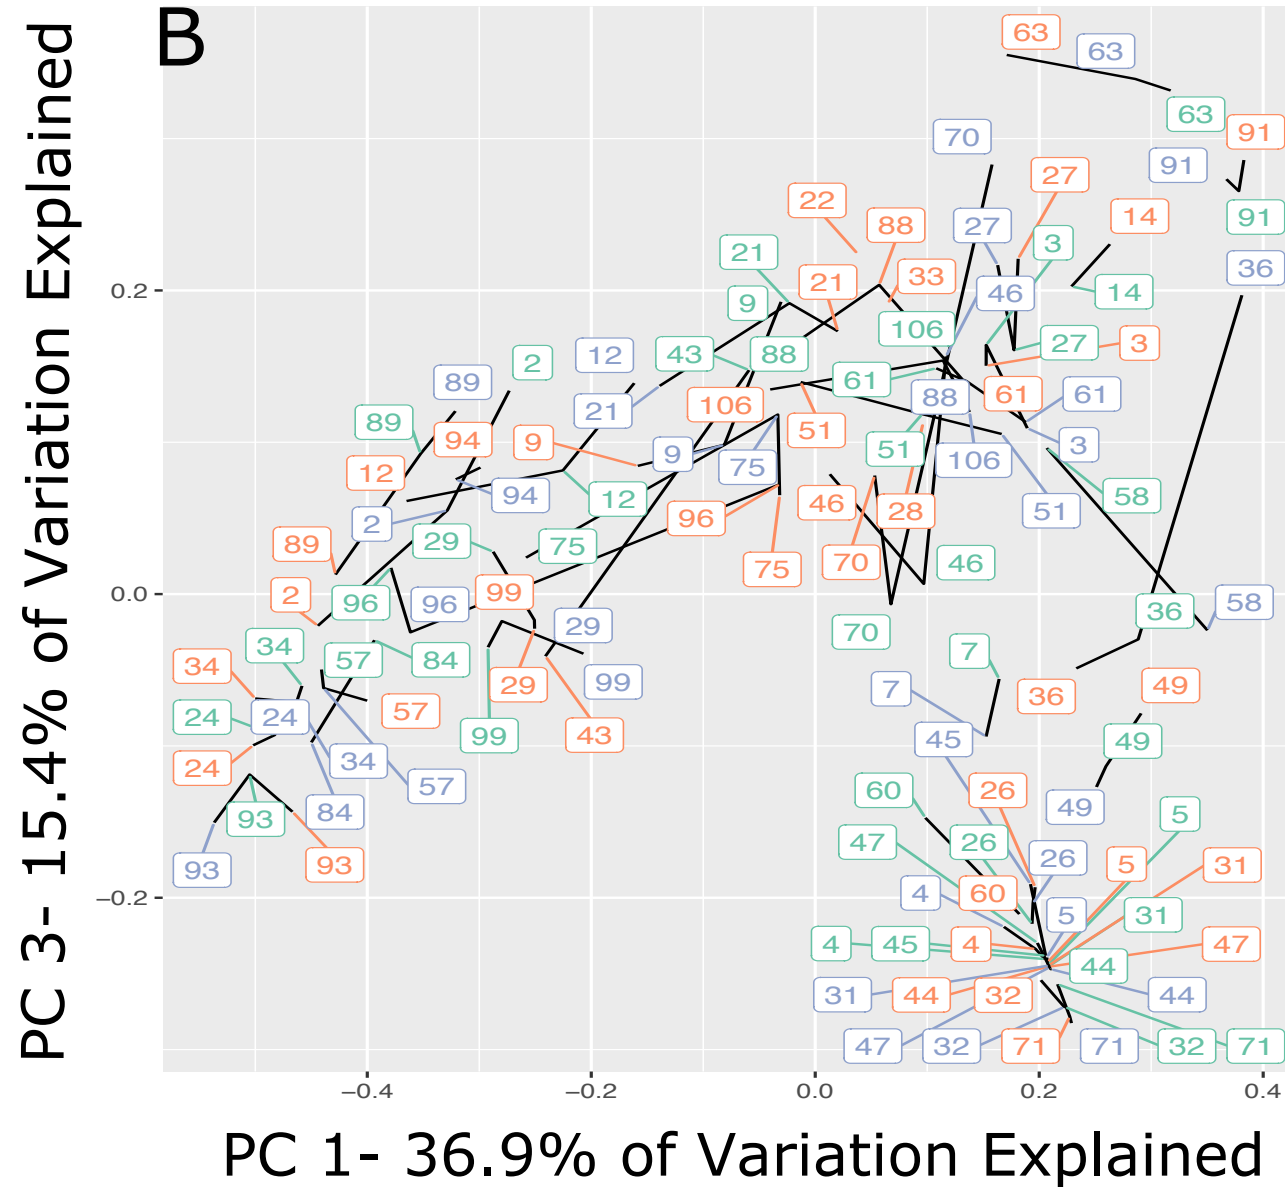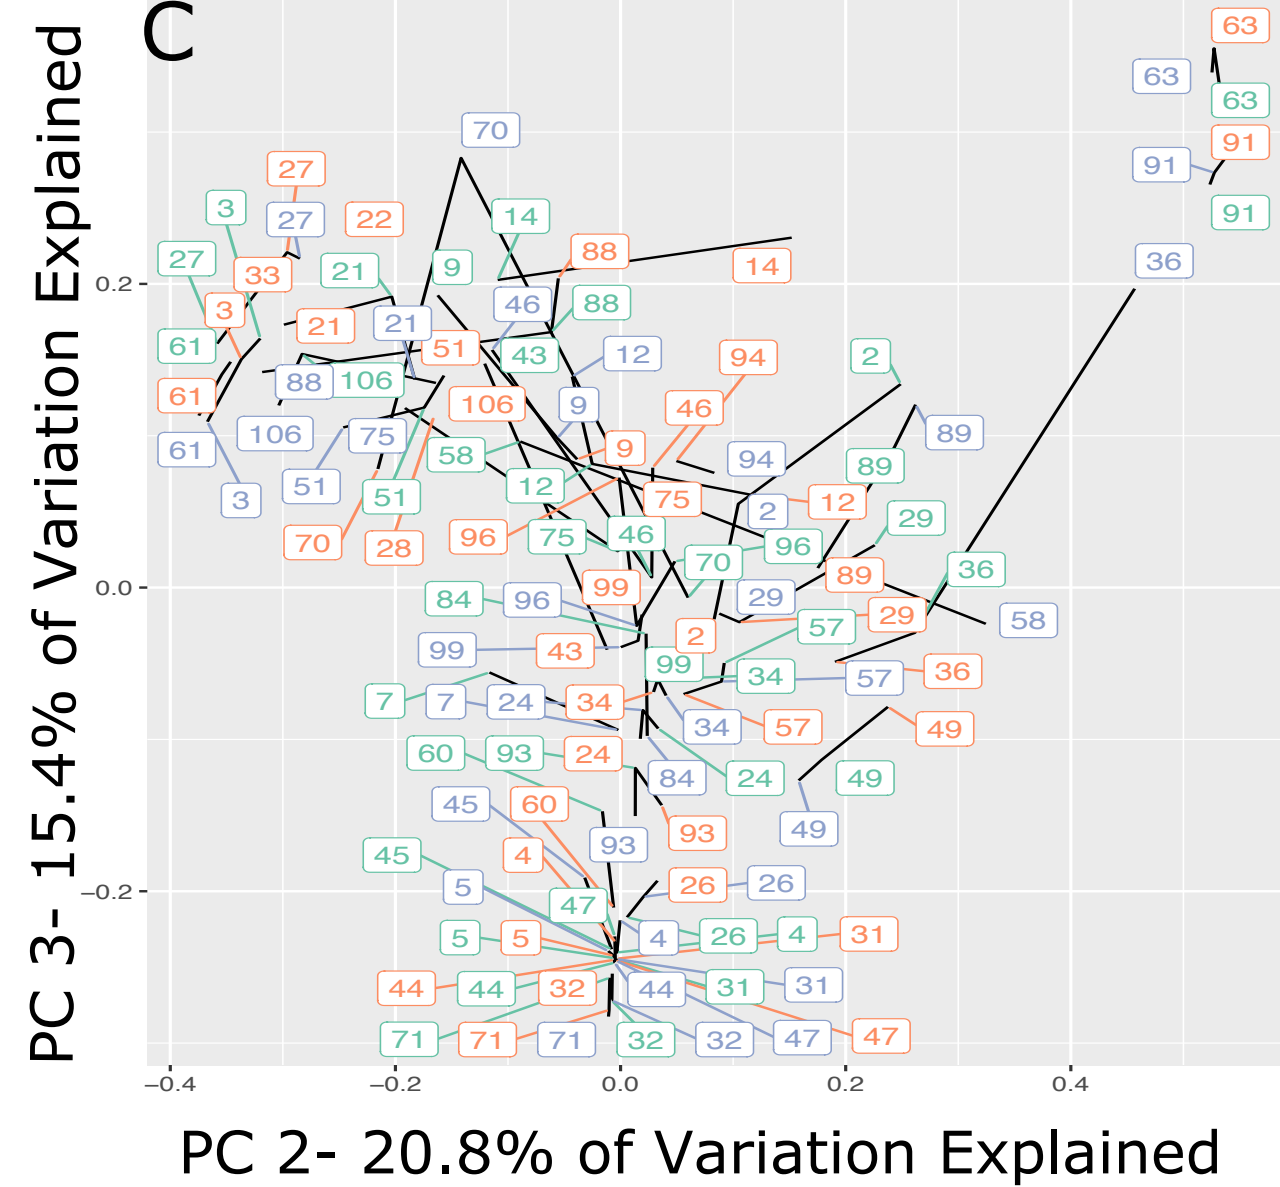

Vaginal Site: # MDV # VIT # VPF
