# Supplementary material for: Shifts in gut and vaginal microbiomes are associated with cancer recurrence time in women with ovarian cancer
Source: PeerJ journal article supplement (doi:10.7717/peerj.11574), 2021-06-17

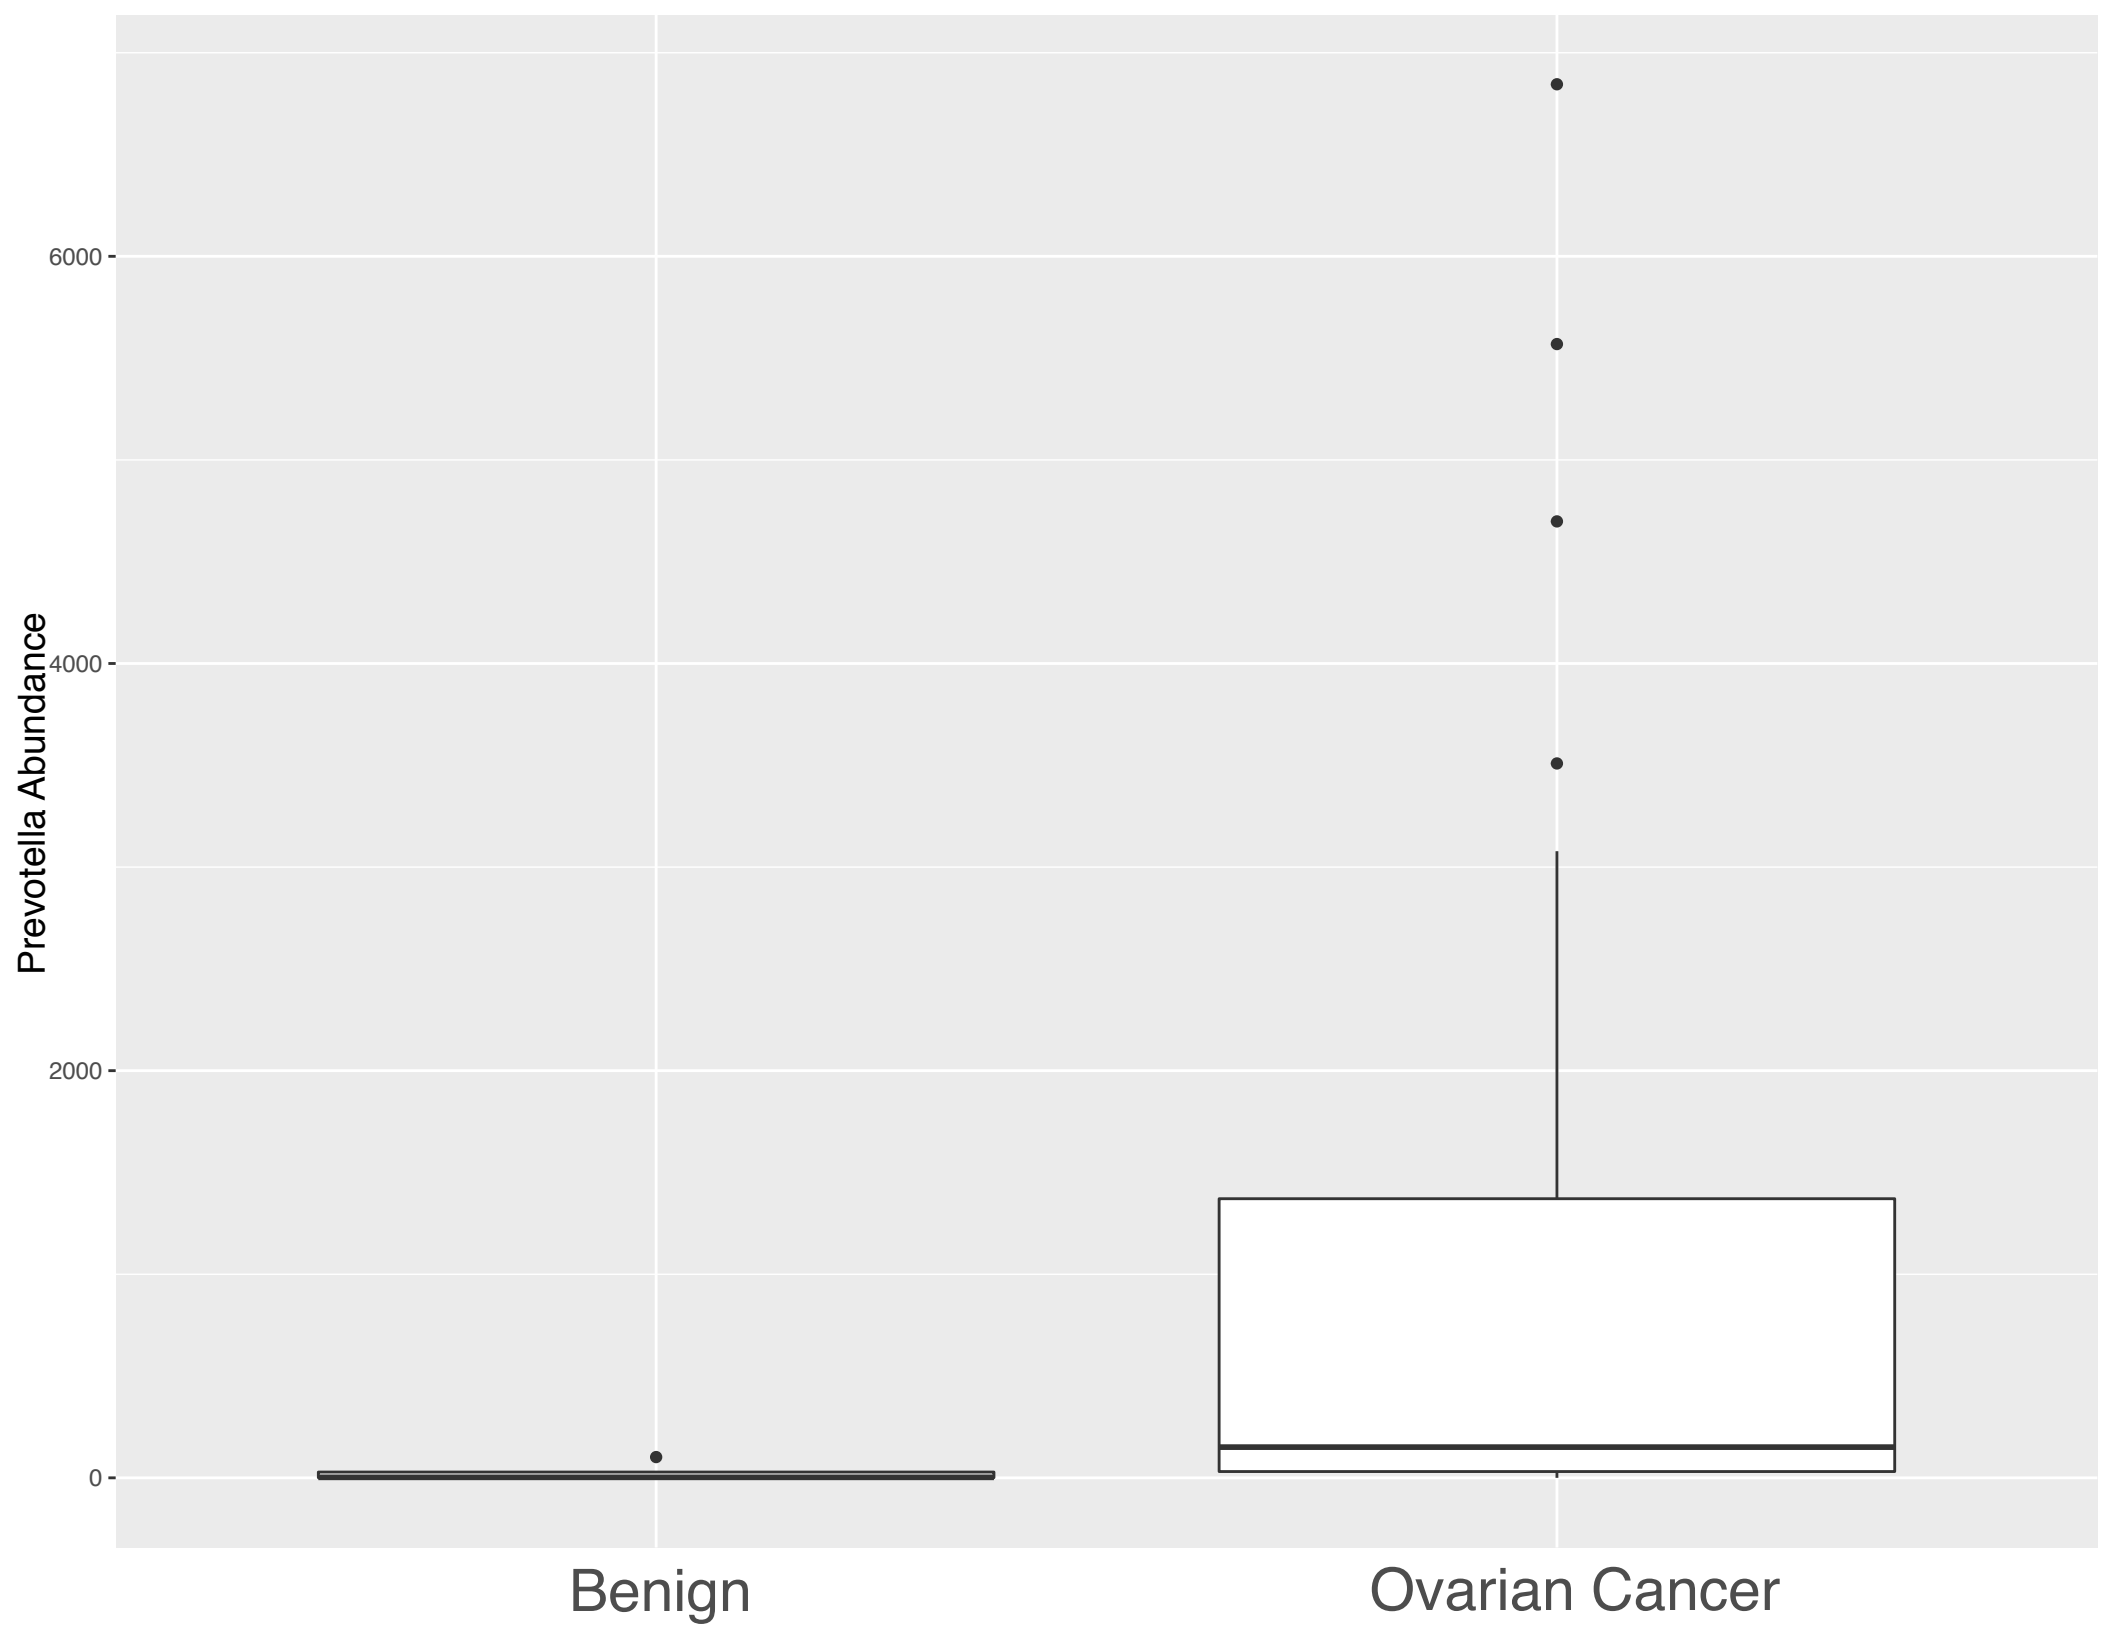

Supplement: figureS8_fecalPrevotella_ovarianVbenign.pdf [file figureS8_fecalPrevotella_ovarianVbenign.pdf]
