# Supplementary material for: Shifts in gut and vaginal microbiomes are associated with cancer recurrence time in women with ovarian cancer
Source: PeerJ. 2021 Jun 17;9:e11574. doi: 10.7717/peerj.11574 (PMC8214851; doi:10.7717/peerj.11574)
Supplement: Supplemental Information 10 [file peerj-09-11574-s010.xlsx]

## Sheet: Supplementary Table 1
SampleID	DominantBacteria	Neuropathy	StudyGroup	age_years	months_last_cycleChemotherapy	MultiVitamin	Probiotic	VitaminB_Folate	VitaminD	Other_Dietary_Supplements	Water_source	Pet	Education	Income	TimeOutdoors	Alchohol	Floss_teeth	BowelMovement_FreqPerDay	BowelMovement_Quality	MostRecentAntibiotics	WeightChange6Months	TonsilsRemoved	AppendixRemoved	Hormonal_Disorder	Acid_Reflux	Surgery	Menopause	HormoneReplacementTherapy	EstrogenEstimate	Ethnicity	Histology	Residual_Disease	Months Last Platinum Cycle
ocm002	prevotella	none	PFI>24	54.9	29	no	never	daily	daily	yes	bottled	dog	some_college	<19,999	<1hr	rarely	rarely	two	normal	6 months	increaseTenPounds	no	yes	yes	yes	iCRS	post_menopausal	no	absent	White	serous	NGR	29
ocm003	escherichia	none	PFI<6	69.5	25	no	never	never	never	no	well	cats_dogs	highSchool_GED	<19,999	<1hr	never	regularly	one	normal	6 months	stable	no	yes	no	yes	pCRS	post_menopausal	no	absent	NativeAmerican	serous	>1cm	25
ocm004	lactobacillus	none	PFI>24	52.9	65	no	never	never	never	no	bottled	dog	highSchool_GED	<19,999	1_3hr	never	regularly	one	diarrhea	>1year	stable	no	no	no	no	pCRS	pre_menopausal	no	present	White	serous	>1cm	65
ocm005	lactobacillus	none	PFI>24	68.9	82	no	never	never	daily	no	city+bottled	dog	<highSchool	<19,999	<1hr	rarely	daily	four	diarrhea	6 months	stable	no	not sure	yes	no	iCRS	post_menopausal	yes	present	White	serous	<1cm	82
ocm007	diverse	>grade2	PFI>24	68.5	53	no	never	never	never	no	city+filtered	dog	graduate_degree	>100,000	1_3hr	never	daily	one	normal	6 months	stable	no	yes	no	no	pCRS	post_menopausal	no	absent	NativeAmerican	serous	NGR	53
ocm009	diverse	none	PFI>24	52.8	98	yes	never	never	daily	no	city	cats_dogs	bachelors	>100,000	<1hr	rarely	daily	<1	normal	>1year	stable	no	no	no	no	pCRS	pre_menopausal	yes	present	White	serous	<1cm	98
ocm012	prevotella	none	PFI>24	59.1	124	yes	never	never	daily	yes	city+filtered	dog	some_college	>50000	<1hr	never	daily	one	normal	1 year	stable	no	yes	no	yes	pCRS	post_menopausal	no	absent	White	serous	NGR	124
ocm014	diverse	N/A	benign	52.8	N/A	no	daily	never	never	yes	city	no	graduate_degree	>100,000	<1hr	never	rarely	one	normal	month	stable	no	no	no	yes	N/A	post_menopausal	no	absent	White	N/A	>1cm	N/A
ocm021	escherichia	UNK	PFI<6	64.8	7	UNK	UNK	UNK	UNK	UNK	UNK	UNK	UNK	UNK	UNK	UNK	UNK	UNK	UNK	UNK	UNK	UNK	UNK	UNK	UNK	iCRS	post_menopausal	no	absent	White	serous	NGR	7
ocm022	escherichia	none	PFI>24	77.7	106	no	never	never	daily	yes	city+filtered	no	associates	NA	<1hr	never	daily	one	constipated	1 year	decreaseTenPounds	yes	no	no	yes	pCRS	post_menopausal	no	absent	White	serous	NGR	106
ocm024	prevotella	none	PFI>24	76.5	40	yes	never	never	never	no	cit+bottled+filtered	no	highSchool_GED	>100,000	1_3hr	never	rarely	one	constipated	>1year	decreaseTenPounds	yes	no	no	yes	pCRS	post_menopausal	no	absent	White	serous	NGR	40
ocm026	lactobacillus	UNK	PFI<6	45.5	10	no	never	never	never	no	city	dog	bachelors	>50000	1_3hr	never	rarely	<1	normal	1 year	increaseTenPounds	yes	yes	yes	yes	iCRS	pre_menopausal	no	present	White	serous	NGR	10
ocm027	diverse	UNK	PFI<6	59.2	7	no	daily	never	never	yes	bottled	cats_dogs	associates	<19,999	>3hr	never	rarely	two	normal	6 months	decreaseTenPounds	no	no	no	no	iCRS	post_menopausal	no	absent	White	serous	<1cm	7
ocm028	diverse	none	PFI>24	71.9	45	yes	daily	never	daily	yes	city+filtered	cat	highSchool_GED	>20,000	<1hr	never	daily	>5	diarrhea	6 months	decreaseTenPounds	yes	yes	yes	yes	pCRS	post_menopausal	no	absent	White	serous	NGR	45
ocm029	prevotella	UNK	PFI<6	68.3	4	no	never	never	never	no	well	dog	highSchool_GED	>50000	1_3hr	never	rarely	three	diarrhea	month	stable	no	no	no	no	iCRS	post_menopausal	no	absent	White	serous	<1cm	4
ocm031	lactobacillus	none	PFI<6	47.2	7	no	never	never	never	yes	bottled	dog	some_college	>20,000	<1hr	rarely	daily	<1	normal	6 months	stable	yes	yes	no	yes	iCRS	pre_menopausal	no	present	White	serous	<1cm	7
ocm032	lactobacillus	>grade2	PFI<6	56.9	6	no	daily	daily	daily	yes	bottled	cats_dogs_other	graduate_degree	>50000	1_3hr	regularly	daily	one	normal	>1year	increaseTenPounds	yes	no	yes	yes	iCRS	post_menopausal	no	absent	White	serous	>1cm	6
ocm033	diverse	>grade2	PFI>24	73.66	68	no	never	never	never	no	bottled	cats_dogs	bachelors	<19,999	<1hr	never	daily	four	normal	>1year	stable	no	yes	yes	no	pCRS	post_menopausal	no	absent	Black	serous	NGR	68
ocm034	prevotella	>grade2	PFI>24	77.9	61	no	daily	never	daily	yes	cit+bottled+filtered	dog	some_college	>20,000	1_3hr	rarely	never	one	normal	month	increaseTenPounds	no	no	no	yes	pCRS	post_menopausal	no	absent	White	serous	NGR	61
ocm036	gardnerella	>grade2	PFI>24	51	39	no	never	never	never	no	filtered	cats_dogs	highSchool_GED	>20,000	<1hr	never	regularly	>5	normal	6 months	decreaseTenPounds	yes	yes	no	no	pCRS	pre_menopausal	no	present	White	serous	NGR	39
ocm043	diverse	none	PFI>24	70.2	67	yes	never	daily	daily	yes	city+bottled	no	bachelors	>50000	<1hr	never	never	one	diarrhea	week	UNK	UNK	UNK	UNK	UNK	iCRS	post_menopausal	yes	present	White	serous	>1cm	67
ocm044	lactobacillus	>grade2	PFI>24	58.2	18	no	never	never	never	no	bottled	dog	highSchool_GED	>20,000	<1hr	never	never	three	diarrhea	1 year	increaseTenPounds	no	yes	no	no	pCRS	post_menopausal	no	absent	White	serous	NGR	18
ocm045	lactobacillus	none	PFI>24	67.9	42	yes	never	daily	daily	NA	bottle+filtered	cat	highSchool_GED	>20,000	1_3hr	never	daily	three	normal	6 months	increaseTenPounds	yes	yes	yes	no	pCRS	post_menopausal	no	absent	White	serous	NGR	42
ocm046	diverse	none	PFI>24	64.4	54	no	daily	daily	rarely	yes	well	dog	graduate_degree	>100,000	1_3hr	regularly	daily	one	normal	6 months	increaseTenPounds	yes	yes	yes	no	pCRS	post_menopausal	no	absent	White	serous	NGR	54
ocm047	lactobacillus	none	PFI>24	70.2	87	NA	never	never	daily	yes	well	cats_dogs_other	some_college	>20,000	<1hr	never	never	two	normal	6 months	stable	no	no	yes	yes	pCRS	post_menopausal	no	absent	White	serous	<1cm	87
ocm049	lactobacillus	>grade2	PFI>24	47.5	8	no	never	never	never	no	well	cats_dogs_other	some_college	<19,999	>3hr	rarely	regularly	one	normal	6 months	decreaseTenPounds	yes	yes	no	yes	iCRS	pre_menopausal	no	present	White	serous	NGR	8
ocm051	diverse	none	PFI>24	45.5	45	no	never	never	never	no	well+bottled	dog	bachelors	>100,000	<1hr	regularly	regularly	>5	diarrhea	week	stable	no	yes	no	yes	pCRS	pre_menopausal	no	present	White	serous	NGR	45
ocm057	prevotella	UNK	PFI<6	74.9	18	no	never	never	never	yes	filtered	no	some_college	>50000	<1hr	rarely	rarely	two	normal	6 months	stable	no	yes	no	yes	pCRS	post_menopausal	no	absent	White	UNK	NGR	18
ocm058	diverse	N/A	benign	79	N/A	yes	never	never	never	yes	well+bottled	dog	graduate_degree	NA	<1hr	rarely	rarely	three	diarrhea	1 year	decreaseTenPounds	no	yes	no	no	N/A	post_menopausal	no	absent	NativeAmerican	N/A	>1cm	N/A
ocm060	lactobacillus	none	PFI>24	60.9	150	yes	daily	daily	daily	yes	filtered	no	bachelors	NA	<1hr	never	regularly	two	dont Know	1 year	stable	no	no	no	yes	pCRS	pre_menopausal	no	present	White	serous	>1cm	150
ocm061	escherichia	none	PFI<6	64.6	9	no	never	never	never	no	well	dog	some_college	>100,000	NA	never	rarely	one	constipated	month	stable	no	no	no	yes	iCRS	post_menopausal	no	absent	White	serous	>1cm	9
ocm063	gardnerella	UNK	PFI>24	58.6	UNK	yes	never	rarely	daily	yes	bottle+filtered	dog	some_college	NA	<1hr	never	daily	one	normal	6 months	increaseTenPounds	yes	no	no	no	pCRS	pre_menopausal	yes	present	White	serous	NGR	N/A
ocm070	diverse	UNK	PFI<6	65.4	38	no	daily	daily	never	yes	city	cats_dogs	graduate_degree	>100,000	>3hr	regularly	daily	two	normal	6 months	increaseTenPounds	not sure	yes	yes	no	pCRS	post_menopausal	no	absent	White	serous	NGR	38
ocm071	lactobacillus	N/A	benign	57.8	N/A	yes	never	never	never	no	city	cats_dogs_other	bachelors	>50000	1_3hr	rarely	daily	one	normal	month	decreaseTenPounds	no	yes	no	no	N/A	post_menopausal	no	absent	White	N/A	>1cm	N/A
ocm075	diverse	UNK	PFI<6	62.5	6	yes	UNK	never	never	no	bottled	NA	some_college	>50000	<1hr	never	rarely	four	normal	month	stable	no	no	yes	yes	no surg	post_menopausal	no	absent	White	serous	>1cm	6
ocm084	prevotella	N/A	benign	33.7	N/A	UNK	UNK	UNK	UNK	UNK	UNK	UNK	UNK	UNK	UNK	UNK	UNK	UNK	UNK	UNK	UNK	UNK	UNK	UNK	UNK	N/A	pre_menopausal	no	present	NativeAmerican	N/A	>1cm	N/A
ocm088	escherichia	none	PFI<6	53.6	1	no	never	never	never	no	bottled	no	graduate_degree	>100,000	1_3hr	never	never	two	normal	6 months	increaseTenPounds	no	no	no	no	iCRS	pre_menopausal	no	present	Black	serous	>1cm	1
ocm089	prevotella	none	PFI<6	82.7	6	no	never	daily	never	no	bottled	no	some_college	>20,000	<1hr	rarely	never	<1	constipated	month	stable	yes	yes	no	yes	iCRS	post_menopausal	no	absent	White	serous	<1cm	6
ocm091	gardnerella	UNK	PFI<6	38.5	35	yes	never	daily	never	yes	well	cats_dogs	associates	>50000	1_3hr	rarely	daily	<1	normal	6 months	stable	no	no	yes	no	iCRS	pre_menopausal	no	present	White	serous	NGR	35
ocm093	prevotella	>grade2	PFI>24	59.7	72	yes	never	never	never	no	filtered	cat	highSchool_GED	NA	<1hr	rarely	never	four	diarrhea	week	stable	no	yes	no	no	pCRS	post_menopausal	no	absent	White	serous	NGR	72
ocm094	diverse	UNK	PFI<6	73.6	3	yes	never	daily	daily	yes	filtered	no	some_graduate_school	>50000	<1hr	never	regularly	one	dont Know	6 months	decreaseTenPounds	yes	no	yes	yes	iCRS	post_menopausal	no	absent	White	serous	>1cm	3
ocm096	diverse	>grade2	PFI>24	63.6	41	no	never	never	never	yes	city+filtered	dog	bachelors	>20,000	<1hr	never	daily	three	normal	month	stable	no	yes	yes	yes	pCRS	post_menopausal	no	absent	White	serous	<1cm	41
ocm098	diverse	>grade2	PFI<6	75.1	15	yes	daily	never	daily	yes	bottled	other_pet	associates	<19,999	<1hr	never	never	two	normal	week	stable	yes	yes	yes	yes	iCRS	post_menopausal	no	absent	White	serous	<1cm	15
ocm099	diverse	N/A	benign	61.9	N/A	no	never	never	regularly	no	city+bottled	dog	highSchool_GED	>100,000	<1hr	regularly	regularly	one	normal	month	decreaseTenPounds	yes	yes	no	no	N/A	post_menopausal	no	absent	White	N/A	>1cm	N/A
ocm106	escherichia	UNK	PFI<6	58	3	no	never	never	rarely	no	filtered	cat	bachelors	>100,000	<1hr	never	regularly	two	diarrhea	6 months	decreaseTenPounds	no	yes	no	yes	iCRS	post_menopausal	no	absent	White	serous	<1cm	3
