# Supplementary material for: Shifts in gut and vaginal microbiomes are associated with cancer recurrence time in women with ovarian cancer
Source: PeerJ. 2021 Jun 17;9:e11574. doi: 10.7717/peerj.11574 (PMC8214851; doi:10.7717/peerj.11574)
Supplement: Supplemental Information 11 — Log-odds ratios and 95% confidence interval values, plus p-values, for every statistical comparison between the study groups (PFI< 6 and PFI > 24). Benign was excluded from statistical comparisons due to low sample size. Statistical tests for continuous variables (age and months since last platinum chemotherapy cycle) were conducted with a T test. [file peerj-09-11574-s011.xlsx]

## Sheet: Sheet1
Variable*	log Odds *	log 95% CI Min	log 95% CI Max	p-value
White Ethnicity	-0.336452	-2.40573	1.7325	0.7499
Iterarive CRS	2.7368	1.18164	4.29195	0.0006
Primary CRS	-3.09887	-4.74443	-1.4503	0.0002
Expected Estrogen Positive	-0.73689	-2.13622	0.662172	0.3019
Take Probiotics	0.430808	-1.12116	1.98268	0.544
Take Vitamin Supplement	-0.693147	-1.98123	0.594817	0.2915
Antibiotics with 6 months	1.27807	-0.215547	2.77294	0.0938
Residual Disease > 1 cm	1.29099	-0.278128	2.8601	0.1068
Variable**	p-value
Age	0.7812
Months Last platinum Cycle	4.32 x 10^-7
* odds given with reference to PFI < 6 months group compared to PFI > 24 months
**variables with stars were tested with t-test because they are continuous
