# Supplementary material for: Shifts in gut and vaginal microbiomes are associated with cancer recurrence time in women with ovarian cancer
Source: PeerJ. 2021 Jun 17;9:e11574. doi: 10.7717/peerj.11574 (PMC8214851; doi:10.7717/peerj.11574)
Supplement: Supplemental Information 12 — Log-odds ratios and 95% confidence interval values, plus p-values, for every statistical comparison between the four dominant vaginal communities (Escherichia, Lactobacillus, Prevotella, and high diversity community) and different metadata categories. [file peerj-09-11574-s012.xlsx]

## Sheet: Sheet1
Metadata	Study Group	pvalue mipoint	oddsRatio_log	lowerCI_log	upperCI_log
Antibiotics within 6 month	Escherichia	0.67	0.536999	-1.76862	3.98913
>60 years old	Escherichia	0.599	0.496843	-1.31556	2.67736
Likely low estrogen levels	Escherichia	0.472	0.803794	-1.20397	4.15544
Iterative Cytoreductive Surgery	Escherichia	0.292	0.993048	-0.837101	3.18946
non-White Ethnicity	Escherichia	0.146	1.47591	-0.511826	3.46355
PFI<6 Months	Escherichia	0.0243	2.27068	0.266586	5.62105
Probiotic supplement	Escherichia	0.52	-0.703198	-4.07454	1.23256
No Vitamin B Supplement	Escherichia	0.3574	1.39925	-1.58108	4.3795
No Vitamin D Supplement	Escherichia	0.499	0.785435	-1.31556	4.16388
Residual Disease < 1cm	Escherichia	0.992	0	-3.53218	2.62852
Residual Disease > 1cm	Escherichia	0.333	1.00155	-1.03503	3.27566
Antibiotics within 1 month	Lactobacillus	0.05148	-2.12263	-5.54198	0.0119641
Antibiotics within 6 month	Lactobacillus	0.443	-0.812931	-2.46886	0.797552
>60 years old	Lactobacillus	0.165	-1.00505	-2.5388	0.404248
Likely low estrogen levels	Lactobacillus	0.0744	-1.32051	-2.83412	0.333539
Iterative Cytoreductive Surgery	Lactobacillus	0.729	0.993048	-0.837101	3.18946
non-White Ethnicity	Lactobacillus	0.2719	-1.62964	-4.61522	1.29937
PFI<6 Months	Lactobacillus	0.4414	-0.587527	-2.29462	0.867521
Probiotic supplement	Lactobacillus	0.912	-0.116534	-2.25379	1.55814
No Vitamin B Supplement	Lactobacillus	0.7177	-0.303973	-1.86789	1.46281
No Vitamin D Supplement	Lactobacillus	0.385	-0.648692	-2.12263	0.836104
Residual Disease < 1cm	Lactobacillus	0.5292	0.583846	-1.3117	2.39692
Residual Disease > 1cm	Lactobacillus	0.5407	0.51393	-1.16321	2.19989
Antibiotics within 1 month	Prevotella	0.528	0.638361	-1.30018	2.91816
Antibiotics within 6 month	Prevotella	0.5961	-0.61305	-3.01016	1.78071
>60 years old	Prevotella	0.994	-0.00600902	-1.52457	1.57328
estrogenAbsent	Prevotella	0.17	1.38002	-0.503354	4.68571
Iterative Cytoreductive Surgery	Prevotella	0.6644	-0.360887	-2.14297	1.24867
non-White Ethnicity	Prevotella	0.827	-0.254892	-2.53831	2.02854
PFI<6 Months	Prevotella	0.7874	-0.217037	-1.959	1.3156
Probiotic supplement	Prevotella	0.519	-0.715393	-4.04555	1.20687
No Vitamin B Supplement	Prevotella	0.875	-0.150094	-1.88424	2.01446
No Vitamin D Supplement	Prevotella	0.89	-0.107435	-1.7255	1.67623
Residual Disease < 1cm	Prevotella	0.659	-0.421442	-2.61127	1.34487
Residual Disease > 1cm	Prevotella	0.1475	-1.51388	-4.85857	0.465396
Antibiotics within 1 month	High Diversity Community	0.225	1.0683	-0.634908	2.97599
Antibiotics within 6 month	High Diversity Community	0.829	0.185158	-1.46627	2.01372
>60 years old	High Diversity Community	0.0601	1.25828	-0.0506356	2.75047
Likely low estrogen levels	High Diversity Community	0.2047	0.926637	-0.478681	2.61176
Iterative Cytoreductive Surgery	High Diversity Community	0.588	-0.377484	-1.81367	0.980838
non-White Ethnicity	High Diversity Community	0.433	0.693147	-1.04129	2.42569
PFI<6 Months	High Diversity Community	0.527	-0.421594	-1.80484	0.864997
Probiotic supplement	High Diversity Community	0.1074	1.21622	-0.28635	3.10874
No Vitamin B Supplement	High Diversity Community	0.835	-0.158736	-1.63606	1.40718
No Vitamin D Supplement	High Diversity Community	0.972	-0.0241452	-1.31942	1.31504
Residual Disease < 1cm	High Diversity Community	0.669	0.349587	-1.30324	1.9461
Residual Disease > 1cm	High Diversity Community	0.329	0.734834	-0.745028	2.24921
Antibiotics within 1 month	High Diversity Community	0.916	-0.175478	-3.91799	3.57014
