# Supplementary material for: Shifts in gut and vaginal microbiomes are associated with cancer recurrence time in women with ovarian cancer
Source: PeerJ. 2021 Jun 17;9:e11574. doi: 10.7717/peerj.11574 (PMC8214851; doi:10.7717/peerj.11574)
Supplement: Supplemental Information 13 — Number of reads mapping to each Lactobacillus species after rarefaction to 9000 reads, as well as percent of Lactobcaillus reads belonging to each species. More than 99% of reads that mapped to Lactobacillus were categorized as L. iners or unassigned to a species. The few individuals with reads mapping to any species besides L. iners prohibited analysis of how Lactobacillus species influences PFI status or any of the metadata collected in our study. [file peerj-09-11574-s013.xlsx]

## Sheet: Sheet1
Individual	Lactobacillus_brevis	Lactobacillus_iners	Lactobacillus_mucosae	Lactobacillus_reuteri	Lactobacillus_zeae	Lactobacillus_delbrueckii	Lactobacillus_unassigned
ocm002	0	3	0	0	0	0	35
ocm003	0	196	0	0	0	1	97
ocm004	0	8196	0	38	0	0	438
ocm005	0	8815	0	0	0	0	8
ocm009	0	1	0	5	4	0	10
ocm012	0	0	0	0	1	0	8
ocm014	0	7	0	4	1	7	835
ocm089	0	0	0	0	0	0	1
ocm091	0	0	0	0	0	0	228
ocm093	0	0	0	0	0	0	0
ocm094	0	0	0	0	0	0	2
ocm096	0	0	0	0	0	0	3
ocm106	0	0	0	0	1	0	1
ocm021	0	0	0	0	0	0	33
ocm022	0	0	0	0	0	0	370
ocm024	0	0	0	1	0	0	7
ocm026	0	1	0	0	0	0	8653
ocm027	0	1	0	0	0	1	224
ocm028	0	1	0	3	0	1	285
ocm029	0	44	0	0	0	0	279
ocm031	0	8668	0	2	0	0	313
ocm032	0	1	0	2	0	0	8847
ocm033	0	3	0	0	0	0	6
ocm034	0	0	0	0	0	0	1
ocm036	0	1	0	0	1	1	4171
ocm043	0	10	0	0	0	0	58
ocm044	0	8921	0	0	0	0	8
ocm045	0	8523	0	0	0	0	7
ocm046	0	229	0	0	0	0	1
ocm047	0	8820	0	0	0	0	2
ocm049	0	6757	0	0	1	1	10
ocm051	0	859	0	0	4	0	101
ocm057	0	0	0	0	0	0	0
ocm058	0	0	0	14	0	1	3716
ocm060	0	1	0	25	0	4	6087
ocm061	0	1	0	0	0	0	1
ocm063	0	0	0	0	0	0	49
ocm007	0	4	0	0	0	0	16
ocm070	0	0	0	0	0	0	5
ocm071	0	0	0	0	0	1	8796
ocm075	0	0	0	0	0	862	90
ocm084	0	0	0	0	0	0	2
ocm088	0	0	1	0	0	0	6
ocm098	7	0	0	6	0	0	100
ocm099	0	0	0	0	0	0	0
Total Reads	7	60063	1	100	13	880	43910
Perecent of Lactobacillus Reads	0.00666832	57.217	0.000952617	0.0952617	0.012384	0.838303	41.8294
